# Supplementary material
Source: MDPI journal article supplement (https://www.mdpi.com/2073-4395/11/11/2325)
Supplement: s1 [file s1]

Table S1. Wheat aphid sampling sites and collection dates

| No. | Location               | Longitude and latitude  | Code     | Species collected                                         | Date      |
|-----|------------------------|-------------------------|----------|-----------------------------------------------------------|-----------|
| 1   | Mianyang, Sichuan      | N31°58'48", E104°86'11" | SCM-2019 | <i>R. padi</i>                                            | 28/2/2019 |
| 2   | Kunming, Yunnan        | N24°59'58", E102°33'11" | YNK-2019 | <i>S. miscanthi</i> , <i>R. padi</i>                      | 3/3/2019  |
|     |                        |                         | YNK-2021 | <i>S. miscanthi</i>                                       | 31/3/2021 |
| 3   | Guiyang, Guizhou       | N26°00'34", E106°35'04" | GZG-2019 | <i>S. miscanthi</i> , <i>R. padi</i> , <i>M. dirhodum</i> | 25/3/2019 |
|     |                        |                         | GZG-2021 | <i>S. miscanthi</i> , <i>R. padi</i> , <i>M. dirhodum</i> | 25/3/2021 |
| 4   | Xiangyang, Hubei       | N32°13'27", E112°13'04" | HBX-2019 | <i>S. miscanthi</i> , <i>R. padi</i>                      | 4/4/2019  |
|     |                        |                         | HBX-2021 | <i>S. miscanthi</i> , <i>R. padi</i>                      | 22/2/2021 |
| 5   | Hefei, Anhui           | N31°53'43", E117°14'21" | AHH-2019 | <i>S. miscanthi</i> , <i>R. padi</i>                      | 12/4/2019 |
|     |                        |                         | AHH-2021 | <i>S. miscanthi</i> , <i>R. padi</i>                      | 10/4/2021 |
| 6   | Yangzhou, Jiangsu      | N32°23'08", E119°25'07" | JSY-2019 | <i>R. padi</i> ,                                          | 14/4/2019 |
| 7   | Zhumadian, Henan       | N33°22'20", E114°04'26" | HNZ-2019 | <i>S. miscanthi</i> , <i>R. padi</i>                      | 25/4/2019 |
| 8   | Xinxiang, Henan        | N35°8'21", E113°46'17"  | HNX-2019 | <i>S. miscanthi</i>                                       | 26/4/2019 |
|     |                        |                         | HNX-2021 | <i>S. miscanthi</i> , <i>R. padi</i>                      | 26/4/2019 |
| 9   | Qingdao, Shandong      | N36°26'19", E120°04'45" | SDQ-2019 | <i>S. miscanthi</i>                                       | 27/4/2019 |
| 10  | Jining, Shandong       | N35°10'12", E116°30'21" | SDJ-2019 | <i>S. miscanthi</i> , <i>R. padi</i>                      | 28/4/2019 |
| 11  | Tianjin                | N39°21'43", E117°12'46" | TJ-2019  | <i>S. miscanthi</i> , <i>R. padi</i>                      | 21/5/2019 |
| 12  | Langfang, Hebei        | N39°30'29", E116°36'09" | HBL-2019 | <i>S. miscanthi</i> , <i>M. dirhodum</i>                  | 12/5/2019 |
|     |                        |                         | HBL-2021 | <i>S. miscanthi</i> , <i>R. padi</i>                      | 21/5/2021 |
| 13  | Yangling, Shanxi       | N34°15'33", E108°02'33" | SXY-2019 | <i>S. miscanthi</i> , <i>R. padi</i> , <i>M. dirhodum</i> | 13/5/2019 |
|     |                        |                         | SXY-2021 | <i>S. miscanthi</i> , <i>R. padi</i> , <i>M. dirhodum</i> | 20/5/2021 |
| 14  | Linfen, Shanxi         | N36°02'33", E111°30'04" | SXL-2019 | <i>S. miscanthi</i> , <i>R. padi</i> , <i>M. dirhodum</i> | 14/5/2019 |
|     |                        |                         | SXL-2021 | <i>R. padi</i>                                            | 21/5/2021 |
| 15  | Kashgar, Xinjiang      | N38°11'25", E77°11'12"  | XJK-2019 | <i>S. miscanthi</i> , <i>R. padi</i> , <i>M. dirhodum</i> | 28/5/2019 |
| 16  | Ili, Xinjiang          | N43°56'33", E81°26'31"  | XJI-2021 | <i>R. padi</i> , <i>M. dirhodum</i>                       | 25/6/2020 |
| 17  | Yinchuan, Ningxia      | N39°5'57", E106°44'51"  | NXY-2019 | <i>S. miscanthi</i> , <i>R. padi</i> , <i>M. dirhodum</i> | 15/6/2019 |
| 18  | Xining, Qinghai        | N36°02'15", E101°27'13" | QHX-2019 | <i>S. miscanthi</i> , <i>R. padi</i> , <i>M. dirhodum</i> | 17/6/2019 |
|     |                        |                         | QHX-2021 | <i>S. miscanthi</i> , <i>R. padi</i>                      | 19/6/2021 |
| 19  | Hailar, Inner Mongolia | N49°58'47", E120°05'45" | IMH-2019 | <i>S. miscanthi</i> , <i>R. padi</i>                      | 3/8/2019  |

**Table S2.** Differences in the toxicity of sulfoxaflor among various wheat aphid field populations

| Code                                     | LDR <sub>50</sub> (95%CI)s) <sup>a</sup> | Hypothesis of equality | Hypothesis of parallelism |
|------------------------------------------|------------------------------------------|------------------------|---------------------------|
|                                          |                                          | $\chi^2, P$            | $\chi^2, P$               |
| <i>S. miscanthi</i> / <i>R. padi</i>     |                                          |                        |                           |
| AHH-2019                                 | 1.897 (1.125-3.199)                      | 8.51, 0.014            | 0.48, 0.488               |
| AHH-2021                                 | 0.295 (0.163-0.531)                      | 40.88, 0.000           | 35.97, 0.000              |
| GZG-2019                                 | 5.276 (2.780-10.015)                     | 34.31, 0.000           | 0.18, 0.671               |
| GZG-2021                                 | 1.110 (0.687-1.791)                      | 3.40, 0.183            | 1.97, 0.160               |
| HBL-2021                                 | 1.309 (0.761-2.250)                      | 2.98, 0.225            | 0.98, 0.323               |
| HBX-2019                                 | 2.909 (1.364-6.203)                      | 28.32, 0.000           | 5.29, 0.021               |
| HBX-2021                                 | 0.644 (0.379-1.094)                      | 28.22, 0.000           | 25.78, 0.000              |
| HNX-2021                                 | 0.054 (0.029-0.099)                      | 135, 0.000             | 3.87, 0.049               |
| HNZ-2019                                 | 2.942 (1.737-4.984)                      | 17.44, 0.000           | 0.00, 1.000               |
| IMH-2019                                 | 0.504 (0.288-0.882)                      | 8.17, 0.017            | 2.34, 0.126               |
| NXY-2019                                 | 3.475 (2.023-5.970)                      | 43.71, 0.000           | 6.67, 0.010               |
| QHX-2019                                 | 2.931 (1.583-5.425)                      | 14.76, 0.001           | 4.08, 0.043               |
| QHX-2021                                 | 0.247 (0.172-0.355)                      | 52.99, 0.000           | 5.26, 0.022               |
| SDJ-2019                                 | 0.588 (0.358-0.967)                      | 8.36, 0.015            | 7.05, 0.008               |
| SXL-2019                                 | 5.396 (2.582-11.280)                     | 23.91, 0.000           | 0.01, 0.939               |
| SXY-2019                                 | 1.090 (0.556-2.133)                      | 0.25, 0.881            | 0.18, 0.672               |
| SXY-2021                                 | 5.846 (4.127-8.280)                      | 109.00, 0.000          | 4.54, 0.033               |
| TJ-2019                                  | 1.058 (0.555-2.018)                      | 0.38, 0.826            | 0.30, 0.585               |
| XJK-2019                                 | 0.343 (0.197-0.598)                      | 15.50, 0.000           | 0.16, 0.691               |
| YNK-2019                                 | 36.254 (12.290-106.950)                  | 89.12, 0.000           | 6.30, 0.012               |
| <i>S. miscanthi</i> / <i>M. dirhodum</i> |                                          |                        |                           |
| GZG-2019                                 | 2.439 (1.386-4.291)                      | 10.32, 0.006           | 0.06, 0.809               |
| GZG-2021                                 | 22.856 (5.934-88.050)                    | 152.00, 0.000          | 0.38, 0.538               |
| HBL-2019                                 | 0.091 (0.027-0.305)                      | 40.86, 0.000           | 15.87, 0.000              |
| NXY-2019                                 | 1.614 (0.935-2.786)                      | 4.69, 0.096            | 0.60, 0.439               |
| QHX-2019                                 | 5.512 (2.87-10.569)                      | 29.47, 0.000           | 0.85, 0.357               |
| SXL-2019                                 | 1.035 (0.486-2.202)                      | 0.05, 0.975            | 0.05, 0.821               |
| SXY-2019                                 | 5.200 (2.431-11.124)                     | 20.71, 0.000           | 1.76, 0.185               |
| SXY-2021                                 | 0.904 (0.567-1.440)                      | 33.30, 0.000           | 32.84, 0.000              |
| XJK-2019                                 | 26.401 (9.984-69.816)                    | 59.40, 0.000           | 14.59, 0.000              |

Continue Table S2.

| Code                                | LDR <sub>50</sub> (95% CIs) <sup>a</sup> | Hypothesis of equality | Hypothesis of parallelism |
|-------------------------------------|------------------------------------------|------------------------|---------------------------|
|                                     |                                          | $\chi^2, P$            | $\chi^2, P$               |
| <i>R. padi</i> / <i>M. dirhodum</i> |                                          |                        |                           |
| GZG-2019                            | 0.462 (0.235-0.907)                      | 6.53, 0.038            | 0.03, 0.857               |
| GZG-2021                            | 20.602 (5.409-78.464)                    | 141.00, 0.000          | 0.00, 0.979               |
| NXY-2019                            | 0.464 (0.283-0.761)                      | 21.97, 0.000           | 4.05, 0.044               |
| QHX-2019                            | 1.075 (0.548-2.110)                      | 1.13, 0.569            | 0.79, 0.375               |
| SXL-2019                            | 4.301 (1.996-9.269)                      | 15.37, 0.000           | 0.64, 0.425               |
| SXY-2019                            | 4.773 (2.213-10.291)                     | 17.71, 0.000           | 0.86, 0.353               |
| SXY-2021                            | 1.000 (0.564-1.772)                      | 0.00, 1.000            | 0.00, 1.000               |
| XJI-2021                            | 0.020 (0.010-0.040)                      | 214.00, 0.000          | 17.20, 0.000              |
| XJK-2019                            | 1.000 (0.124-8.043)                      | 0.00, 1.000            | 0.00, 1.000               |

<sup>a</sup> the 95% confidence intervals of median lethal dose ratio.

The LCR<sub>50</sub> (95% CIs) > 1 indicated that the latter species was more susceptible to sulfoxaflor than the former species. The LCR<sub>50</sub> (95% CIs) < 1 indicated that the latter species was less susceptible to sulfoxaflor than the former species. The inclusion of 1 in the LCR<sub>50</sub> (95% CIs) indicated that the susceptibility levels of the two species to sulfoxaflor were not significantly different.
